# Supplementary material for: Beef tenderness and intramuscular fat proteomic biomarkers: muscle type effect
Source: PeerJ. 2018 Jun 7;6:e4891. doi: 10.7717/peerj.4891 (PMC5994332; doi:10.7717/peerj.4891)
Supplement: Table S1 — The red and green rows highlight the significant negative or positive correlations, respectively. [file peerj-06-4891-s001.xlsx]

## Sheet: Correlation coefficients
Table S1. Robust Pearson correlation coefficients obtained for the five muscles and for each muscle alone that were used to build the correlation network.
Proteins	TTN	ENO3	HSP27	α-Tubulin	HSP40	HSP20	PRDX6	MDH1	PYGB	HSP70-1A	PGK1	ALDOA	CRYAB	MyHC-IIX	TRIM72	MLC1F	FHL1	TNNT1	ALDH1A1	TPI1
TTN
ENO3
HSP27
α-Tubulin
HSP40
HSP20			0.408776
PRDX6
MDH1	0.364886						-0.384279
PYGB
HSP70-1A
PGK1		0.840047	-0.532088			-0.414106
ALDOA					0.302878						0.440341
CRYAB		-0.825763	0.639156			0.430214					-0.755214
MyHC-IIX			-0.534653			-0.443973		0.38754			0.481375		-0.645931
TRIM72										-0.222864
MLC1F	-0.382612									-0.381772				0.441553
FHL1	-0.519054															0.322166
TNNT1		-0.678938	0.460866										0.76148	-0.684933
ALDH1A1			0.581289										0.674668	-0.604826			0.238468	0.56252
TPI1		0.828216					0.282396				0.766799		-0.752342		-0.281801		-0.240715		-0.520114
Proteins	TTN	ENO3	HSP27	α-Tubulin	HSP40	HSP20	PRDX6	MDH1	PYGB	HSP70-1A	PGK1	ALDOA	CRYAB	MyHC-IIX	TRIM72	MLC1F	FHL1	TNNT1	ALDH1A1	TPI1
TTN
ENO3
HSP27
α-Tubulin
HSP40
HSP20			0
PRDX6
MDH1	4.44089e-16						0
PYGB
HSP70-1A
PGK1		0	0			0
ALDOA					2.94491e-11						0
CRYAB		0	0			0					0
MyHC-IIX			0			0		0			0		0
TRIM72										1.66223e-06
MLC1F	0									0				0
FHL1	0															1.35802e-12
TNNT1		0	0										0	0
ALDH1A1			0										0	0			1.95358e-07	0
TPI1		0					8.29522e-10				0		0		1.02554e-09		1.533e-07		0
